# Supplementary material for: Systematic review of the association between physical activity and burnout
Source: PubMed Central journal article supplement — J Occup Health. 2017 Oct 7;59(6):477–94. doi: 10.1539/joh.17-0050-RA (PMC5721270; doi:10.1539/joh.17-0050-ra), 2017-10-07
Supplement: 1348-9585-59-477-s001.pdf [file 1348-9585-59-477-s001.pdf]

## Annex 1. Search strategy

### **Search Strategy**

Burnout AND physic\* activ\* AND employ\* | Burnout AND physic\* activ\* AND work\* | Burnout AND exercise AND employ\* | Burnout AND exercise AND work\* | Emotional exhaustion AND physic\* activ\* AND employ\* | Emotional exhaustion AND physic\* activ\* AND work\* | Emotional exhaustion AND exercise AND employ\* | Emotional exhaustion AND exercise AND work\* | Occupation\* stress AND physic\* activ\* AND employ\* | Occupation\* stress AND physic\* activ\* AND work\* | Occupation\* stress AND exercise AND employ\* | Occupation\* stress AND exercise AND work\*
